# Supplementary material for: Low-temperature microwave-assisted hydrothermal fabrication of RGO/MnO2–CNTs nanoarchitectures and their improved performance in supercapacitors
Source: Royal Society of Chemistry journal article supplement (doi:10.1039/c6ra20615h), 2016-01-01
Supplement: c6ra20615h1.pdf [file c6ra20615h1.pdf]

Supporting information

**Low-temperature microwave-assistant hydrothermal  
fabrication of RGO/MnO<sub>2</sub>-CNTs nanoarchitectures and  
their improved performance in supercapacitor**

Jie Zhang <sup>a</sup>, Hailang Zhang <sup>a,b,\*</sup>, Yingjun Cai <sup>b</sup>, Haitao Zhang <sup>b\*</sup>

*<sup>1</sup>School of Chemical and Material Engineering, Jiangnan University, Wuxi 214122,  
Jiangsu Province, PR China.*

*<sup>2</sup>Beijing Key Laboratory of Ionic Liquids Clean Process, Key Laboratory of Green  
Process and Engineering, State Key Laboratory of Multiphase Complex Systems,  
Institute of Process Engineering, Chinese Academy of Sciences, Beijing 100190, PR  
China.*

\*Corresponding author: Hailang Zhang, Haitao Zhang

E-mail: zh18868@vip.163.com; [htzhang@ipe.ac.cn](mailto:htzhang@ipe.ac.cn)

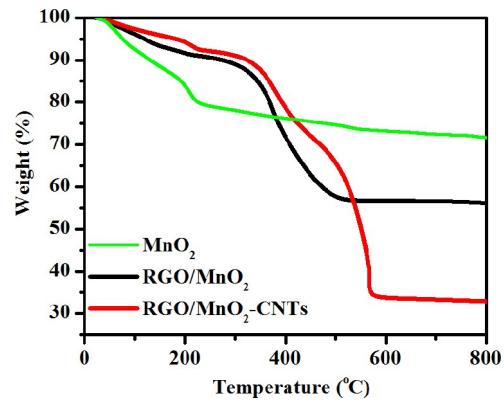

Fig. S1 TG curve of as-prepared MnO<sub>2</sub>, RGO/MnO<sub>2</sub>, and RGO/MnO<sub>2</sub>-CNTs

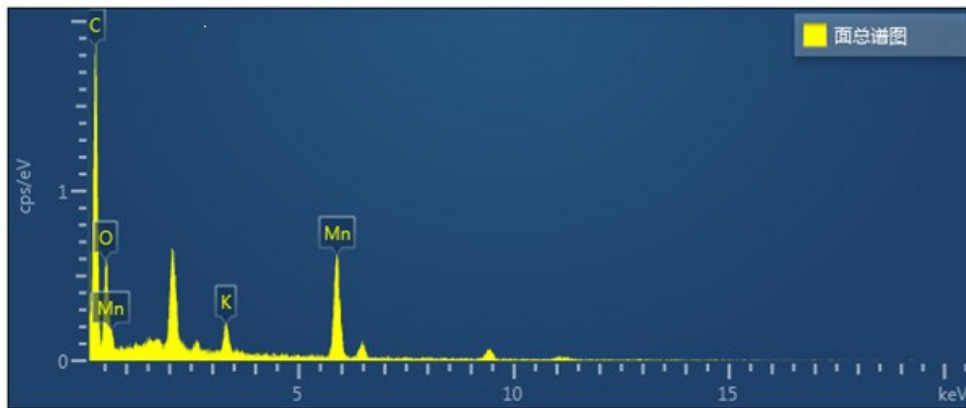

Fig. S2 EDS spectrum of RGO/MnO<sub>2</sub>-CNTs nanocomposites.

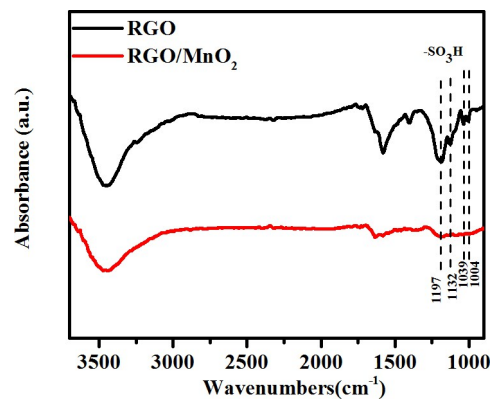

Fig. S3 FTIR spectra of RGO and RGO/MnO<sub>2</sub>.
